# Supplementary material for: A systematic review of implementation strategies for assessment, prevention, and management of ICU delirium and their effect on clinical outcomes
Source: Springer Nature journal article supplement (doi:10.1186/s13054-015-0886-9), 2015-03-27
Supplement: MOESM1 [file 9780382]

**Additional file 1: Search string and search results**

| <b>Database</b>                                     | <b>Search string</b>                                                                                                                                                                                        | <b>Identified</b> | <b>Duplicates excluded</b> | <b>Retrieved</b> |
|-----------------------------------------------------|-------------------------------------------------------------------------------------------------------------------------------------------------------------------------------------------------------------|-------------------|----------------------------|------------------|
| <b>PubMed</b>                                       | (Deliri*[tw] OR Confusion*[tiab] OR Psychosis[tiab] OR Psychoses[tiab] OR Psychotic[tw] OR brain failure*[tiab]) AND (Intensive Care*[tw] OR ICU*[tiab] OR critical care*[tiab] OR critically ill*[tiab])   | 1917              | 15                         | (1902)           |
| <b>Embase</b>                                       | ('intensive care psychosis'/de OR ((Deliri* OR Psychotic OR Confusion* OR Psychosis OR Psychoses) NEAR/6 ('Intensive Care' OR ICU OR 'critical care' OR 'critically ill' OR 'critical illness')):de,ab,ti ) | 1232              | 904                        | (328)            |
| <b>PsycINFO</b>                                     | ((Deliri* OR Psychotic OR Confusion* OR Psychosis OR Psychoses) ADJ6 ('Intensive Care' OR ICU OR 'critical care' OR 'critically ill' OR 'critical illness'))                                                | 181               | 125                        | (56)             |
| <b>Cochrane</b>                                     | ((Deliri* OR Psychotic OR Confusion* OR Psychosis OR Psychoses) NEAR/6 ('Intensive Care' OR ICU OR 'critical care' OR 'critically ill' OR 'critical illness'))                                              | 15                | 8                          | (7)              |
| <b>CINAHL</b>                                       | MM "ICU Psychosis" OR SU((Deliri* OR Confusion* OR Psychosis OR Psychoses OR Psychotic OR "brain failure*") AND ("Intensive Care*" OR ICU* OR "critical care*" OR "critically ill*"))                       | 636               | 447                        | (189)            |
| <b>Total:</b>                                       |                                                                                                                                                                                                             |                   |                            |                  |
|                                                     |                                                                                                                                                                                                             | 3981              | 1499                       | 2482             |
| <b>Total # of studies excluded before year 2000</b> |                                                                                                                                                                                                             |                   |                            | 514              |
| <b>Remaining # of identified studies</b>            |                                                                                                                                                                                                             |                   |                            | <b>1968</b>      |
