# Supplementary material for: A systematic review of implementation strategies for assessment, prevention, and management of ICU delirium and their effect on clinical outcomes
Source: Springer Nature journal article supplement (doi:10.1186/s13054-015-0886-9), 2015-03-27
Supplement: MOESM2 [file 9780382]

## Additional file 2: Adapted Rating system from Anderson and Sharpe

| <b>Design of study or assignment rating</b>                                                                                                         | <b>Rating</b> |
|-----------------------------------------------------------------------------------------------------------------------------------------------------|---------------|
| Experimental: RCT, random allocation; CCT, quasi-random allocation; three data collection points before and after the intervention                  | 1             |
| Quasi-experimental: CBA, comparable control sites                                                                                                   | 1             |
| Quasi-experimental: nonequivalent control sites                                                                                                     | 0             |
| Single group before-after tests with baseline measurement                                                                                           | 0             |
| <b>Content</b>                                                                                                                                      |               |
| Intervention, implementation strategy is clearly described                                                                                          | 1             |
| <b>Sample size</b>                                                                                                                                  |               |
| Described and justified. An n per group sufficient to detect a significant effect ( $p < 0.05$ ) with a power of 0.80 or reported Power calculation | 1             |
| <b>Validity and reliability of instruments</b>                                                                                                      |               |
| Unobtrusive observations, rater procedure described and $r > 0.80$                                                                                  | 2             |
| Unobtrusive observations, rater procedure not described or $r < 0.80$                                                                               | 1             |
| Obtrusive observations, rater procedure not described or $r < 0.80$                                                                                 | 0             |
|                                                                                                                                                     |               |
| <b>Test statistics</b>                                                                                                                              |               |
| Test statistics are described                                                                                                                       | 1             |
| <b>Significance</b>                                                                                                                                 |               |
| $p$ value or confidence interval is given                                                                                                           | 1             |

CBA=controlled before-and-after study, CCT=controlled clinical trial, ITS=interrupted time series.
