# Supplementary material for: A systematic review of implementation strategies for assessment, prevention, and management of ICU delirium and their effect on clinical outcomes
Source: Springer Nature journal article supplement (doi:10.1186/s13054-015-0886-9), 2015-03-27
Supplement: MOESM3 [file 9780382]

### Additional file 3: Quality Rating of Implementation Studies

| Author                                        | Design of study or assignment rating | Content | Sample size | Validity and reliability of instruments | Test statistics | Significance | Total |
|-----------------------------------------------|--------------------------------------|---------|-------------|-----------------------------------------|-----------------|--------------|-------|
| Balas et al, 2014, USA                        | 1                                    | 1       | 0           | 2                                       | 1               | 1            | 6     |
| Bowen et al, 2012, USA                        | 0                                    | 1       | 0           | 2                                       | 1               | 0            | 4     |
| Devlin et al, 2008, USA                       | 1                                    | 1       | 1           | 2                                       | 1               | 1            | 7     |
| Eastwood et al, 2012, Australia               | 0                                    | 1       | 0           | 2                                       | 1               | 1            | 5     |
| Gesin et al, 2012, USA                        | 1                                    | 1       | 1           | 2                                       | 1               | 1            | 7     |
| Hagar et al, 213, USA                         | 1                                    | 1       | 0           | 2                                       | 1               | 1            | 6     |
| Kamdar, et al, 2013, USA                      | 1                                    | 1       | 1           | 2                                       | 1               | 1            | 7     |
| Kastrup et al, 2011, Germany                  | 1                                    | 1       | 0           | 2                                       | 1               | 1            | 6     |
| *Khalifezadeh et al, 2011, Iran               | 1                                    | 0       | 0           | 0                                       | 1               | 0            | 2     |
| Mansouri et al, 2013, Iran                    | 1                                    | 1       | 0           | 1                                       | 1               | 1            | 5     |
| Page et al, 2009, UK                          | 0                                    | 1       | 0           | 2                                       | 1               | 1            | 5     |
| Pun et al, 2005, USA                          | 1                                    | 1       | 0           | 2                                       | 1               | 1            | 6     |
| Radtke , Heymann et al, 2012, Germany         | 1                                    | 1       | 0           | 2                                       | 1               | 1            | 6     |
| Reade et al, 2011, Australia                  | 0                                    | 1       | 0           | 2                                       | 1               | 1            | 5     |
| Riekerk et al, 2009, The Netherlands          | 1                                    | 1       | 0           | 2                                       | 1               | 1            | 6     |
| Robinson et al, 2008, USA                     | 1                                    | 1       | 0           | 2                                       | 1               | 1            | 6     |
| Scott et al, 2012, UK                         | 1                                    | 1       | 0           | 2                                       | 0               | 0            | 4     |
| Skrobik et al, 2010, Canada                   | 1                                    | 1       | 0           | 2                                       | 1               | 1            | 6     |
| Soja et al, 2008, USA                         | 1                                    | 1       | 0           | 2                                       | 1               | 1            | 6     |
| Van den Boogaard et al, 2009, The Netherlands | 1                                    | 1       | 0           | 2                                       | 1               | 1            | 6     |
| Dale et al, 2014, USA                         | 1                                    | 1       | 0           | 2                                       | 1               | 1            | 6     |
| Bryczkowski et al, 2014, USA                  | 1                                    | 1       | 0           | 2                                       | 1               | 1            | 6     |

The item validity and reliability was adapted adding one extra point for first option (Unobtrusive observations, rater procedure described and  $r > 0.80$ ) for a better distinction when implementation procedure is well described.

\* Excluded
